# Supplementary material for: Decline in Morel Production upon Continuous Cropping Is Related to Changes in Soil Mycobiome
Source: MDPI journal article supplement (doi:10.3390/jof9040492), 2023-04-20
Supplement: s1 [file s1]

# Supporting Information

## Supplementary figures

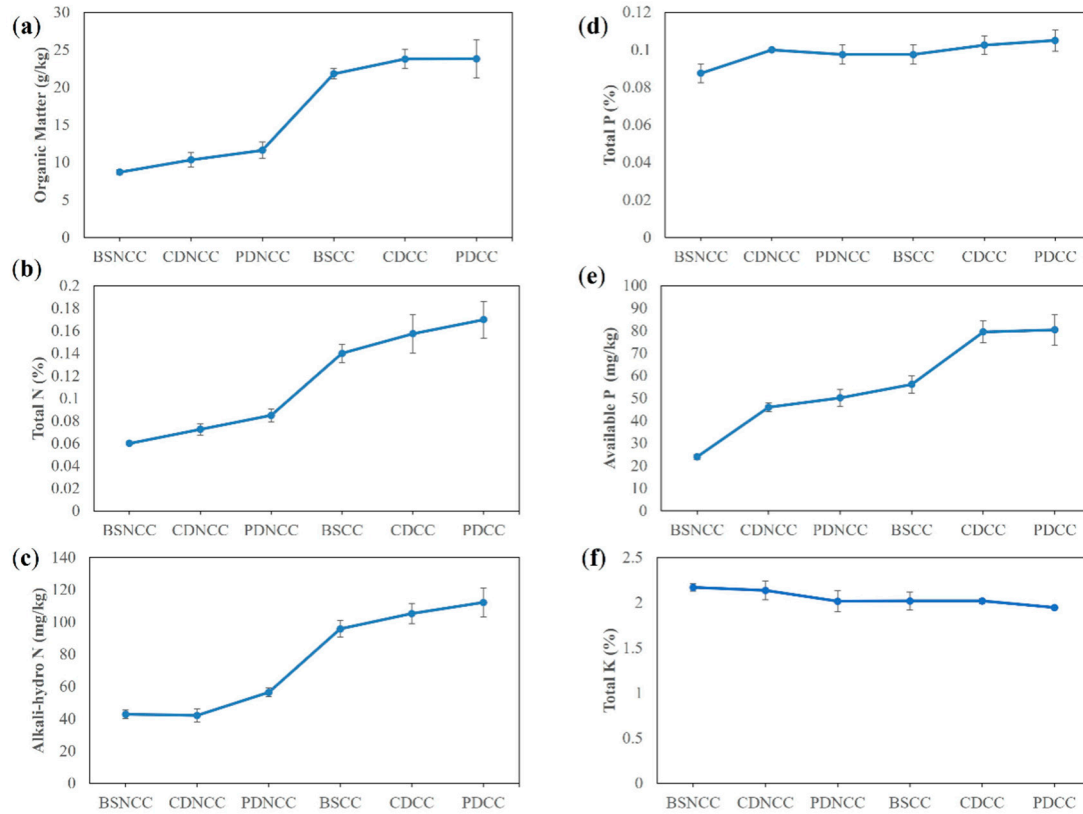

**Figure S1.** Line charts of physicochemical characteristics significantly related to morel primordial yield during black morel cultivation. (a) Organic Matter; (b) Total N; (c) Alkali-hydro N; (d) Total P; (e) Available P; (f) Total K

## Supplementary tables

**Table S1.** The number of high-quality sequences in every replicate.

| Sample Name | Fungi high-quality sequences |
|-------------|------------------------------|
| BSNCCA      | 64,532                       |
| BSNCCB      | 63,617                       |
| BSNCCC      | 69,617                       |
| BSNCCD      | 66,821                       |
| BSCCA       | 65,567                       |
| BSCCB       | 62,457                       |
| BSCCC       | 60,797                       |
| BSCCD       | 69,778                       |
| BSCCiA      | 60,690                       |
| BSCCiB      | 60,411                       |

|               |                |
|---------------|----------------|
| BSCCiC        | 62,218         |
| BSCCiD        | 69,280         |
| CDNCCA        | 64,665         |
| CDNCCB        | 69,829         |
| CDNCCC        | 61,906         |
| CDNCCD        | 66,996         |
| CDCCA         | 65,636         |
| CDCCB         | 66,848         |
| CDCCC         | 67,164         |
| CDCCD         | 66,195         |
| CDCCiA        | 69,294         |
| CDCCiB        | 66,655         |
| CDCCiC        | 60,439         |
| CDCCiD        | 65,986         |
| PDNCCA        | 66,035         |
| PDNCCB        | 69,384         |
| PDNCCC        | 64,454         |
| PDNCCD        | 65,536         |
| PDCCA         | 66,816         |
| PDCCB         | 62,383         |
| PDCCC         | 61,792         |
| PDCCD         | 69,714         |
| PDCCiA        | 68,599         |
| PDCCiB        | 67,020         |
| PDCCiC        | 62,169         |
| PDCCiD        | 61,345         |
| <b>Sum</b>    | <b>2352645</b> |
| <b>Min</b>    | <b>60411</b>   |
| <b>Max</b>    | <b>69829</b>   |
| <b>Median</b> | <b>65811</b>   |

**Table S2.** Keystone OTUs identified in soil fungal communities documented with taxonomy assignments, stage, Modules, OTU IDs, degree of co-occurrence values, eigenvector centrality, group, whether or not csOTU and top50.

| Stage | Modules | Node name | Degree | Eigne<br>vector<br>_centr<br>ality | Group | Phylum         | Class               | Order            | Family                | Genus       | Species                        | csOTU | top50 |
|-------|---------|-----------|--------|------------------------------------|-------|----------------|---------------------|------------------|-----------------------|-------------|--------------------------------|-------|-------|
| BS    | 2       | OTU_173   | 106    | 0.9076                             | BSNCC | Ascomy<br>cota | Dothideo<br>mycetes | Pleospor<br>ales | Phaeospha<br>eriaceae | Septoriella | Septorie<br>lla_phra<br>gmitis | Yes   | +     |
|       | 2       | OTU_36    | 95     | 0.9523                             | BSNCC | Ascomy<br>cota | Sordario<br>mycetes | Hypocre<br>ales  | Nectriaceae           | Gibberella  | Gibberel<br>la_acum<br>inata   | Yes   |       |
|       | 2       | OTU_96    | 84     | 0.9493                             | BSNCC | Ascomy<br>cota | Leotiomy<br>cetes   | Helotial<br>es   | Helotiaceae           | unassigned  | unassign<br>ed                 | Yes   |       |
|       | 2       | OTU_94    | 97     | 0.9047                             | BSNCC | Ascomy<br>cota | unassigne<br>d      | unassign<br>ed   | unassigned            | unassigned  | unassign<br>ed                 | Yes   |       |
|       | 2       | OTU_122   | 96     | 1.0000                             | BSNCC | unassign<br>ed | unassigne<br>d      | unassign<br>ed   | unassigned            | unassigned  | unassign<br>ed                 | Yes   |       |

|    |   |              |    |        |                                |                        |                     |                     |                         |                |                |     |   |
|----|---|--------------|----|--------|--------------------------------|------------------------|---------------------|---------------------|-------------------------|----------------|----------------|-----|---|
|    | 2 | OTU_183      | 98 | 0.9181 | BSNCC                          | unassig<br>ned         | unassigne<br>d      | unassig<br>ned      | unassigned              | unassigned     | unassig<br>ned | Yes |   |
|    | 2 | OTU_23       | 89 | 0.9314 | BSNCC                          | unassig<br>ned         | unassigne<br>d      | unassig<br>ned      | unassigned              | unassigned     | unassig<br>ned | Yes | + |
|    | 2 | OTU_231      | 78 | 0.9287 | BSNCC                          | unassig<br>ned         | unassigne<br>d      | unassig<br>ned      | unassigned              | unassigned     | unassig<br>ned | Yes |   |
|    | 2 | OTU_82       | 99 | 0.9294 | BSNCC                          | unassig<br>ned         | unassigne<br>d      | unassig<br>ned      | unassigned              | unassigned     | unassig<br>ned | Yes |   |
|    | 1 | OTU_103<br>2 | 93 | 0.9395 | BSCC_B<br>SCCi                 | unassig<br>ned         | unassigne<br>d      | unassig<br>ned      | unassigned              | unassigned     | unassig<br>ned | Yes |   |
|    | 1 | OTU_25       | 89 | 0.9243 | BSCCi                          | unassig<br>ned         | unassigne<br>d      | unassig<br>ned      | unassigned              | unassigned     | unassig<br>ned | Yes | + |
|    | 1 | OTU_62       | 95 | 0.9144 | BSCC_B<br>SCCi                 | unassig<br>ned         | unassigne<br>d      | unassig<br>ned      | unassigned              | unassigned     | unassig<br>ned | Yes |   |
|    | 1 | OTU_64       | 95 | 0.9057 | BSCC_B<br>SCCi                 | unassig<br>ned         | unassigne<br>d      | unassig<br>ned      | unassigned              | unassigned     | unassig<br>ned | Yes |   |
|    | 1 | OTU_72       | 96 | 0.9075 | BSCC_B<br>SCCi                 | unassig<br>ned         | unassigne<br>d      | unassig<br>ned      | unassigned              | unassigned     | unassig<br>ned | Yes |   |
|    | 1 | OTU_75       | 95 | 0.9503 | BSCC_B<br>SCCi                 | unassig<br>ned         | unassigne<br>d      | unassig<br>ned      | unassigned              | unassigned     | unassig<br>ned | Yes |   |
| CD | 1 | OTU_100      | 75 | 0.9999 | Mortiere<br>CDNCCIlomycot<br>a | Mortierell<br>omycetes | Mortiere<br>llales  | Mortierella<br>ceae | unassigned              |                | unassig<br>ned | Yes |   |
|    | 1 | OTU_579      | 98 | 0.9001 | CDNCC                          | Ascomy<br>cota         | unassigne<br>d      | unassig<br>ned      | unassigned              | unassigned     | unassig<br>ned | Yes |   |
|    | 1 | OTU_59       | 74 | 0.9201 | CDNCC                          | Ascomy<br>cota         | Dothideo<br>mycetes | Pleospor<br>ales    | Phaeospha<br>eriaceae   | unassigned     | unassig<br>ned | Yes |   |
|    | 1 | OTU_65       | 86 | 0.9425 | CDNCC                          | unassig<br>ned         | unassigne<br>d      | unassig<br>ned      | unassigned              | unassigned     | unassig<br>ned | Yes |   |
| PD | 1 | OTU_137<br>8 | 75 | 0.9501 | Mortiere<br>PDNCCIlomycot<br>a | Mortierell<br>omycetes | Mortiere<br>llales  | Mortierella<br>ceae | Mortierella             |                | unassig<br>ned | Yes |   |
|    | 2 | OTU_47       | 82 | 0.9135 | PDCC_<br>PDCCi                 | Ascomy<br>cota         | Eurotiom<br>ycetes  | Chaetot<br>hyriales | Herpotrichi<br>ellaceae | unassigned     | unassig<br>ned | Yes |   |
|    | 2 | OTU_78       | 80 | 0.9402 | PDCC_<br>PDCCi                 | Ascomy<br>cota         | Sordario<br>mycetes | Sordaria<br>les     | Chaetomia<br>ceae       | Dichotomopilus | unassig<br>ned | Yes |   |
|    | 2 | OTU_121      | 80 | 0.9952 | PDCC_<br>PDCCi                 | unassig<br>ned         | unassigne<br>d      | unassig<br>ned      | unassigned              | unassigned     | unassig<br>ned | Yes |   |
